# Supplementary material
Source: Springer Nature journal article supplement (https://www.springermedizin.de/resource/supplementary/13017_2009_152_MOESM1_ESM.pdf/9635586)

A.

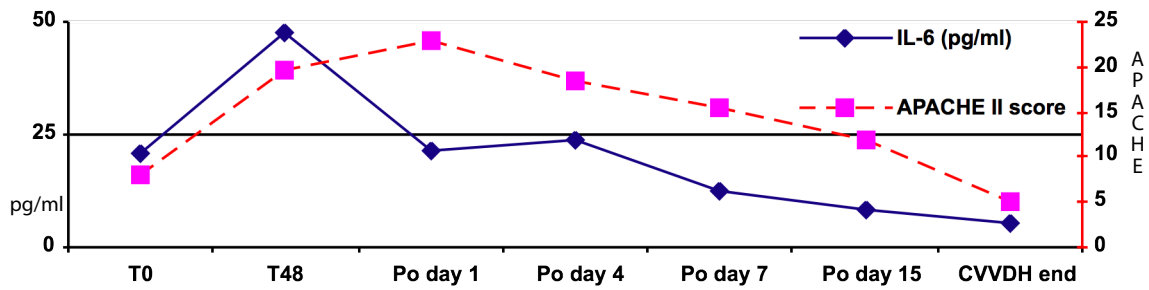

B.

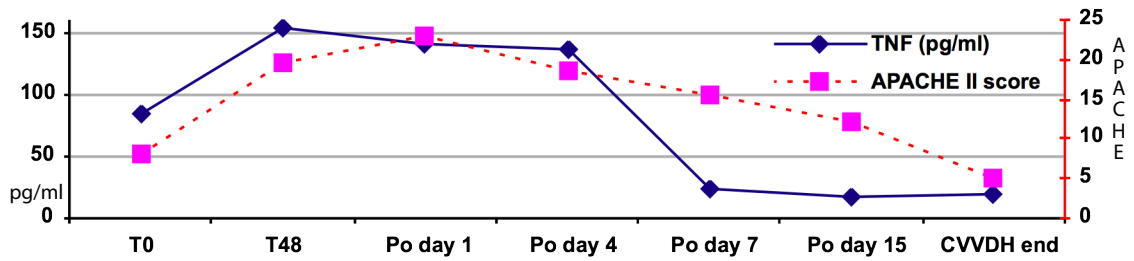

C.

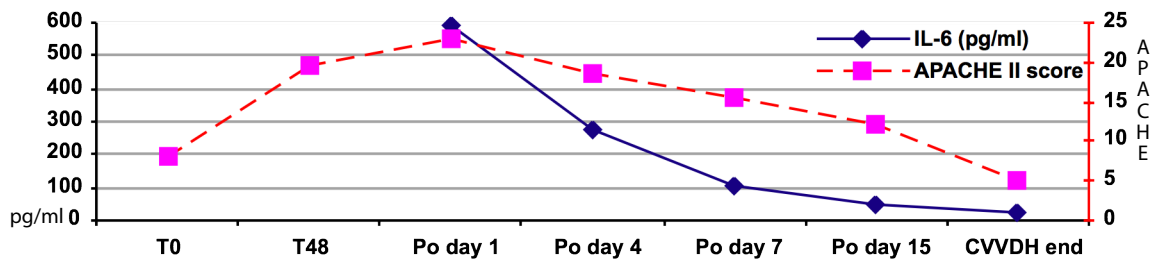

D.

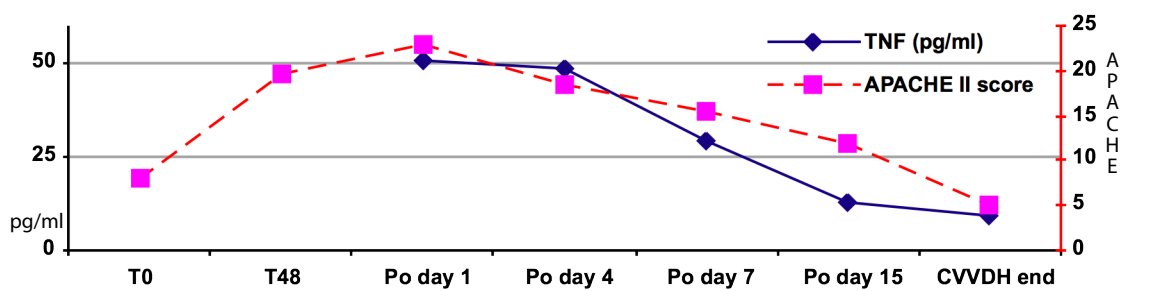

E.

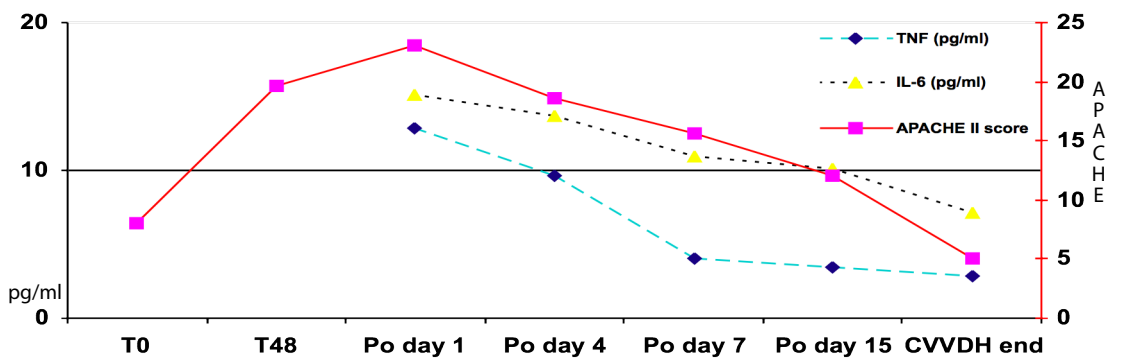

Supplement: MOESM1 [file 9635586]
